# Supplementary material
Source: publisher figshare collection journal article supplement (https://tandf.figshare.com/ndownloader/files/18005222)
Supplement: Supplementary file [file 18005222]

## Supplementary data

**Table 1. The International Classification of Diseases 10th edition (ICD-10) codes used as search criteria at the PIC**

| ICD10-code |                                                              |
|------------|--------------------------------------------------------------|
| S83.5      | Sprain of the cruciate ligament(s) of the knee               |
| S83.6      | Sprain and strain of other and unspecified parts of the knee |
| S83.7      | Injury of multiple structures of the knee                    |
| S89.7      | Multiple injuries of the lower leg                           |
| S89.9      | Unspecified injury of the lower leg                          |
| M23.5      | Chronic instability of the knee                              |
| M23.6      | Other spontaneous disruption of ligament(s) of the knee      |
| M23.8      | Other internal derangements of the knee                      |
| M24.2      | Disorder of a ligament                                       |

**Table 5. Compensated claims. Values are frequency**

|                                                  |    |
|--------------------------------------------------|----|
| Skill-based errors (n = 46)                      |    |
| Graft malposition                                | 34 |
| ACLR not done during primary arthroscopy         | 5  |
| Removal of fixation material or broken drill bit | 4  |
| Saphenous nerve lesion                           | 2  |
| Broken BTB graft was used                        | 1  |
| Infections (n = 34)                              |    |
| Deep infection                                   | 34 |
| Knowledge-based errors (n = 6)                   |    |
| Problems of healthcare organization              | 3  |
| Delay in primary diagnosis                       | 3  |
| Other (n = 14)                                   |    |
| Failed osteotomy before ACLR                     | 3  |
| Antithrombotic dose too high                     | 2  |
| No antithrombotic used in high-risk patient      | 2  |
| Anesthesiological problem                        | 1  |
| Re-rupture during postoperative patient transfer | 1  |
| Wrong knee was operated on                       | 1  |
| Multifactorial reasons                           | 4  |

**Table 6. Errors when drilling the tunnels. Values are frequency**

| Error type                              | TT | AM | Unknown | Total | Femoral side |
|-----------------------------------------|----|----|---------|-------|--------------|
| Femoral tunnel too anterior             | 10 | 5  |         | 15    | 15           |
| Femoral tunnel too vertical             | 3  | 1  | 1       | 5     | 5            |
| Tibial tunnel too posterior             | 2  | 3  |         | 5     |              |
| Femoral tunnel too posterior, blow out  |    | 3  |         | 3     | 3            |
| Graft position too anterior             |    |    | 1       | 1     |              |
| Both tunnels too anterior               | 1  |    |         | 1     | 1            |
| Tibial tunnel too vertical              | 1  |    |         | 1     |              |
| Tibial tunnel too anterior              | 1  |    |         | 1     |              |
| Femoral tunnel not optimal <sup>a</sup> |    | 1  |         | 1     | 1            |
| All tunnels suspicious <sup>b</sup>     |    |    | 1       | 1     | 1            |
| Total                                   |    |    |         | 34    | 26           |

<sup>a</sup> No specific argument.

<sup>b</sup> After ACLR and revision it was difficult to estimate.

TT = transtibial drilling technique, AM = anteromedial drilling technique, unknown = unknown drilling technique.

**Table 7. Paid compensations in €**

|                                                                    |                      |
|--------------------------------------------------------------------|----------------------|
| Skill-based errors (n = 46)                                        |                      |
| Graft malposition                                                  | 280,100 <sup>a</sup> |
| ACLR not done during primary arthroscopy                           | 13,700               |
| Removal of fixation material or broken drill bit                   | 25,800               |
| Saphenous nerve lesion                                             | 16,400               |
| Broken BTB graft was used                                          | 6,800                |
| Infections (n = 34)                                                |                      |
| Deep infection                                                     | 420,200 <sup>b</sup> |
| Knowledge-based errors (n = 6)                                     |                      |
| Problems of healthcare organization and delay in primary diagnosis | 19,200 <sup>c</sup>  |
| Other (n = 14)                                                     |                      |
| Failed osteotomy before ACLR                                       | 23,800               |
| Antithrombotic dose too high                                       | 4,400 <sup>c</sup>   |
| No antithrombotic used in high-risk patient                        | 2,600                |
| Anesthesiological problem                                          | 900                  |
| Re-rupture during postoperative patient transfer                   | 600                  |
| Wrong knee was operated on                                         | 2,900                |
| Multifactorial reasons                                             | 6,300                |

<sup>a</sup> In 3 cases, documents concerning the paid compensation missing.

<sup>b</sup> In 2 cases, documents concerning the paid compensation missing.

<sup>c</sup> In 1 case, documents concerning the paid compensation missing.
